# Supplementary material for: Rendering Multivariate Statistical Models for Genetic Diversity Assessment in A-Genome Diploid Wheat Population
Source: MDPI journal article supplement (doi:10.3390/agronomy11112339), 2021-11-19
Supplement: s1 [file s1]

## Supplementary Material

**Table S1.** Correlation coefficients and p-values for different morphological traits in A-genome donor diploid wheat.

|      |       | PH      | DH      | FLL     | FLD     | PdL     | Till    | SpL     | SpS     | TBM     | SWsp    | NSS    |
|------|-------|---------|---------|---------|---------|---------|---------|---------|---------|---------|---------|--------|
| DH   | r     | 0.6129  |         |         |         |         |         |         |         |         |         |        |
|      | p-val | <0.0001 |         |         |         |         |         |         |         |         |         |        |
| FLL  | r     | 0.3341  | 0.516   |         |         |         |         |         |         |         |         |        |
|      | p-val | <0.0001 | <0.0001 |         |         |         |         |         |         |         |         |        |
| FLD  | r     | 0.4005  | 0.5115  |         |         |         |         |         |         |         |         |        |
|      | p-val | <0.0001 | <0.0001 | <0.0001 |         |         |         |         |         |         |         |        |
| PdL  | r     | 0.6366  | 0.321   | 0.1917  | 0.2759  |         |         |         |         |         |         |        |
|      | p-val | <0.0001 | 0.0011  | 0.0561  | 0.0055  |         |         |         |         |         |         |        |
| Till | r     | 0.5308  | 0.7303  | 0.274   | 0.2657  | 0.1934  |         |         |         |         |         |        |
|      | p-val | <0.0001 | <0.0001 | 0.0058  | 0.0075  | 0.0539  |         |         |         |         |         |        |
| SpL  | r     | 0.5285  | 0.5282  | 0.4859  | 0.5114  | 0.3189  | 0.3535  |         |         |         |         |        |
|      | p-val | <0.0001 | <0.0001 | <0.0001 | <0.0001 | 0.0012  | 0.0003  |         |         |         |         |        |
| SpS  | r     | 0.4691  | 0.8825  | 0.4502  | 0.4194  | 0.1684  | 0.6789  | 0.3894  |         |         |         |        |
|      | p-val | <0.0001 | <0.0001 | <0.0001 | <0.0001 | 0.094   | <0.0001 | <0.0001 |         |         |         |        |
| TBM  | r     | 0.4894  | 0.812   | 0.398   | 0.3466  | 0.1725  | 0.6364  | 0.3095  | 0.8895  |         |         |        |
|      | p-val | <0.0001 | <0.0001 | <0.0001 | 0.0004  | 0.0861  | <0.0001 | 0.0017  | <0.0001 |         |         |        |
| SWsp | r     | 0.5348  | 0.8511  | 0.6208  | 0.5662  | 0.2872  | 0.5634  | 0.4341  | 0.8497  | 0.7199  |         |        |
|      | p-val | <0.0001 | <0.0001 | <0.0001 | <0.0001 | 0.0038  | <0.0001 | <0.0001 | <0.0001 | <0.0001 |         |        |
| NSS  | r     | 0.449   | 0.7614  | 0.4867  | 0.5527  | 0.2964  | 0.4371  | 0.4018  | 0.6873  | 0.5473  | 0.8698  |        |
|      | p-val | <0.0001 | <0.0001 | <0.0001 | <0.0001 | 0.0027  | <0.0001 | <0.0001 | <0.0001 | <0.0001 | <0.0001 |        |
| GY   | r     | -0.026  | 0.4943  | 0.1683  | 0.1631  | -0.0485 | 0.307   | 0.1163  | 0.4086  | 0.2416  | 0.3493  | 0.2948 |
|      | p-val | 0.797   | <0.0001 | 0.0942  | 0.1049  | 0.6316  | 0.0019  | 0.2492  | <0.0001 | 0.0155  | 0.0004  | 0.0029 |

PH: Plant Height, DH: Days to Heading, FLL: Flag Leaf Length, FLD: Flag Leaf Diameter, PdL: Peduncle Length, Till: Tillers per plant, SpL: Spike Length, SpS: Number of Spikelets Per Spike, TBM: Total BioMass, SWsp: Seed Weight per Spike, NSS: Number of Seeds per Spike, GY: Grain Yield. The correlations are estimated by the Row-wise method.

**Table S2.** Eigenvalues contributing to different PCs for morphological traits in A-genome donor diploid studied wheat traits.

| Component | Eigenvalue | Percent | Cum Percent | ChiSquare | DF     | Prob>ChiSq |
|-----------|------------|---------|-------------|-----------|--------|------------|
| 1         | 6.3351     | 52.793  | 52.793      | 1044.67   | 60.997 | <0.0001*   |
| 2         | 1.5273     | 12.728  | 65.520      | 521.982   | 60.568 | <0.0001*   |
| 3         | 1.1248     | 9.373   | 74.894      | 414.938   | 51.549 | <0.0001*   |
| 4         | 0.7604     | 6.336   | 81.230      | 327.494   | 42.828 | <0.0001*   |
| 5         | 0.6719     | 5.599   | 86.829      | 272.962   | 34.228 | <0.0001*   |
| 6         | 0.4306     | 3.589   | 90.418      | 208.992   | 26.611 | <0.0001*   |
| 7         | 0.3905     | 3.254   | 93.672      | 176.661   | 19.772 | <0.0001*   |
| 8         | 0.3379     | 2.816   | 96.488      | 134.547   | 13.791 | <0.0001*   |
| 9         | 0.2219     | 1.849   | 98.336      | 74.026    | 9.068  | <0.0001*   |
| 10        | 0.1015     | 0.846   | 99.183      | 16.900    | 4.921  | 0.0044*    |
| 11        | 0.0511     | 0.426   | 99.609      | 0.163     | 1.846  | 0.9021     |
| 12        | 0.0469     | 0.391   | 100.000     | 0.000     | .      | .          |
